# Supplementary material for: Recycling application of waste Li–MnO2 batteries as efficient catalysts based on electrochemical lithiation to improve catalytic activity
Source: Royal Society of Chemistry journal article supplement (doi:10.1039/c8gc02183j), 2018-01-01
Supplement: c8gc02183j1.pdf [file c8gc02183j1.pdf]

## Electronic Supplementary Information

### Recycling application of waste Li-MnO<sub>2</sub> batteries as efficient catalysts based on electrochemical lithiation improve catalytic activity

Xu Wang,<sup>a</sup> Haijun Qiu,<sup>a</sup> Haolin Liu,<sup>a</sup> Penghui Shi,<sup>a, b, \*</sup> Jinchun Fan,<sup>a</sup> Yulin Min<sup>a, \*</sup> and Qunjie Xu<sup>a, b, \*</sup>

<sup>a</sup> *Shanghai Key Laboratory of Materials Protection and Advanced Materials in Electric Power, Shanghai University of Electric Power, Shanghai 200090, P. R. China*

<sup>b</sup> *Shanghai institute of pollution control and ecological security, Shanghai 200090, P. R. China*

*\* Corresponding author.*

*E-mail addresses: shipenghui@shiep.edu.cn (P. Shi), minyulin@shiep.edu.cn (Y. Min), xuqunjie@shiep.edu.cn (Q. Xu).*

## Materials

Oxone ( $2\text{KHSO}_5 \cdot \text{KHSO}_4 \cdot \text{K}_2\text{SO}_4$ , 4.5% to 4.9% active oxygen) was obtained from Shanghai Ansin Chemical Co. Ltd. and used as an oxidant. Rhodamine B ( $\text{C}_{28}\text{H}_{31}\text{ClN}_2\text{O}_3$ ) was obtained from Shanghai Aladdin Reagent Co. Ltd. and used as an organic pollutant. Sodium phosphate dibasic dehydrate ( $\text{Na}_2\text{HPO}_4$ , 99%), Sodium phosphate monobasic dehydrate ( $\text{NaH}_2\text{PO}_4 \cdot 2\text{H}_2\text{O}$ ), and N-Methyl pyrrolidone (NMP,  $\text{C}_5\text{H}_9\text{NO}$ ) were provided by Shanghai Aladdin Reagent Co. Ltd. All of these chemicals were used as received without any further purification. These waste and new Li-MnO<sub>2</sub> batteries from the Sony 2032 type Button Battery.

### The related treatment of the recycled MnO<sub>2</sub>

As a comparison, the appropriate amount of the recycled MnO<sub>2</sub> was treated with NMP for 1 h at 100 °C to remove the binder on surface of the lithiated MnO<sub>2</sub>. And then the samples was collected and washed with deionized water and ethanol several times before vacuum drying at 60 °C overnight. Meanwhile, the recycled MnO<sub>2</sub> was placed in a Muffle furnace, and then the temperature was increased to 400 °C at 2 °C/min in an air atmosphere 2 h based on the thermodynamic behavior obtained by TG analysis. The reprocessing may be regenerated the recycled MnO<sub>2</sub><sup>1</sup>.

### The detailed preparation of phosphate buffer solution

The phosphate buffer solution was prepared by mixing 1.85 g/L Na<sub>2</sub>HPO<sub>4</sub> and 1.52 g/L NaH<sub>2</sub>PO<sub>4</sub> in 1 L deionized water<sup>2</sup>.

### The detailed procedures of the experimental cycle

For the recycling experiment about the reusability of catalyst, the several parallel experiments were performed in the each cycle to ensure that the subsequent catalyst is sufficient. For the recycling experiment of catalyst, and the catalyst was collected by filtering and washed with absolute ethanol and deionized water for several times before vacuum drying at 60 °C overnight.

**Table S1** The metal contents of the cathode material

| Metals        | Mn   | Li   |
|---------------|------|------|
| Content (wt%) | 55.6 | 4.22 |

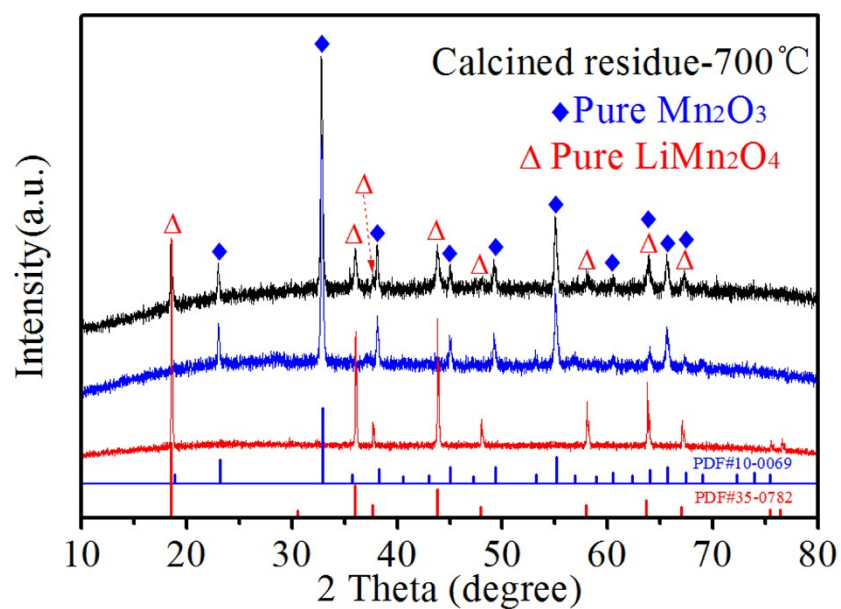

**Fig. S1** XRD pattern of the recycled  $\text{MnO}_2$  in an air atmosphere at 700 °C.

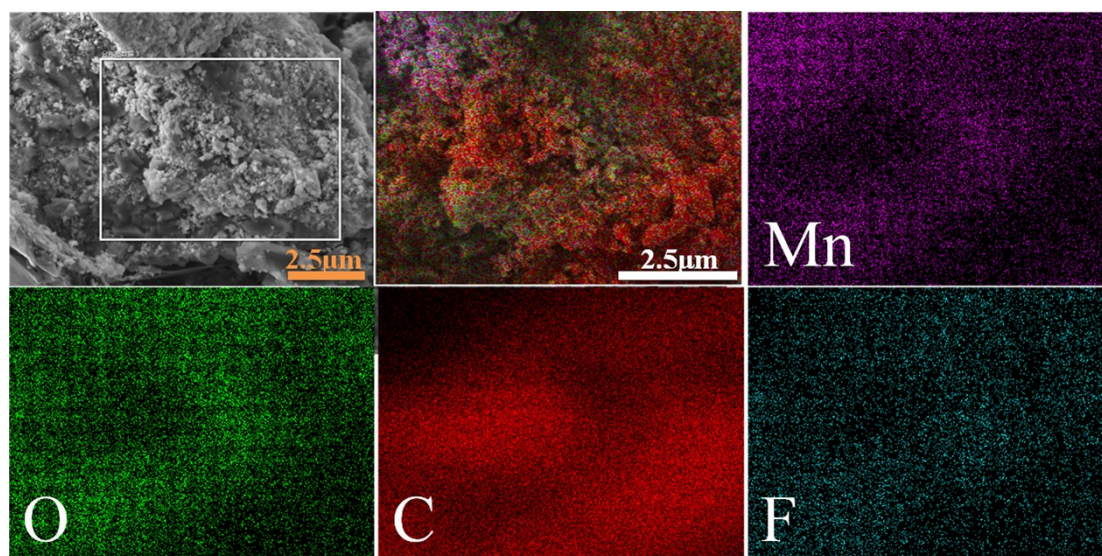

**Fig. S2** EDX elemental maps of the recycled  $\text{MnO}_2$ .

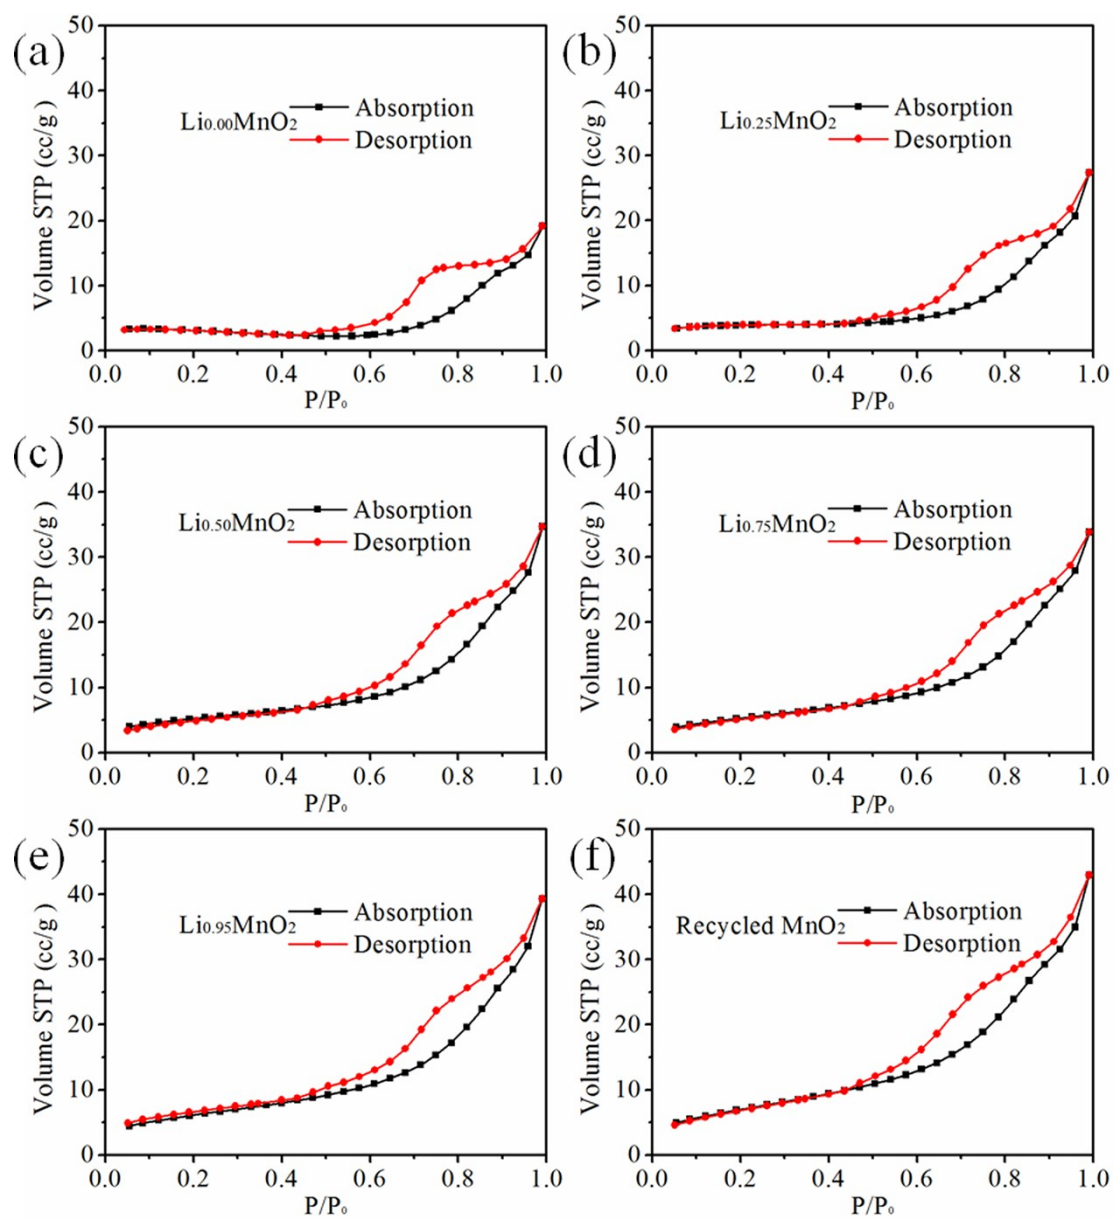

**Fig .S3** N<sub>2</sub> adsorption/desorption isotherms of the the Li<sub>x</sub>MnO<sub>2</sub> cathode (x=0, 0.25, 0.5, 0.75 and 0.95) and recycled MnO<sub>2</sub>.

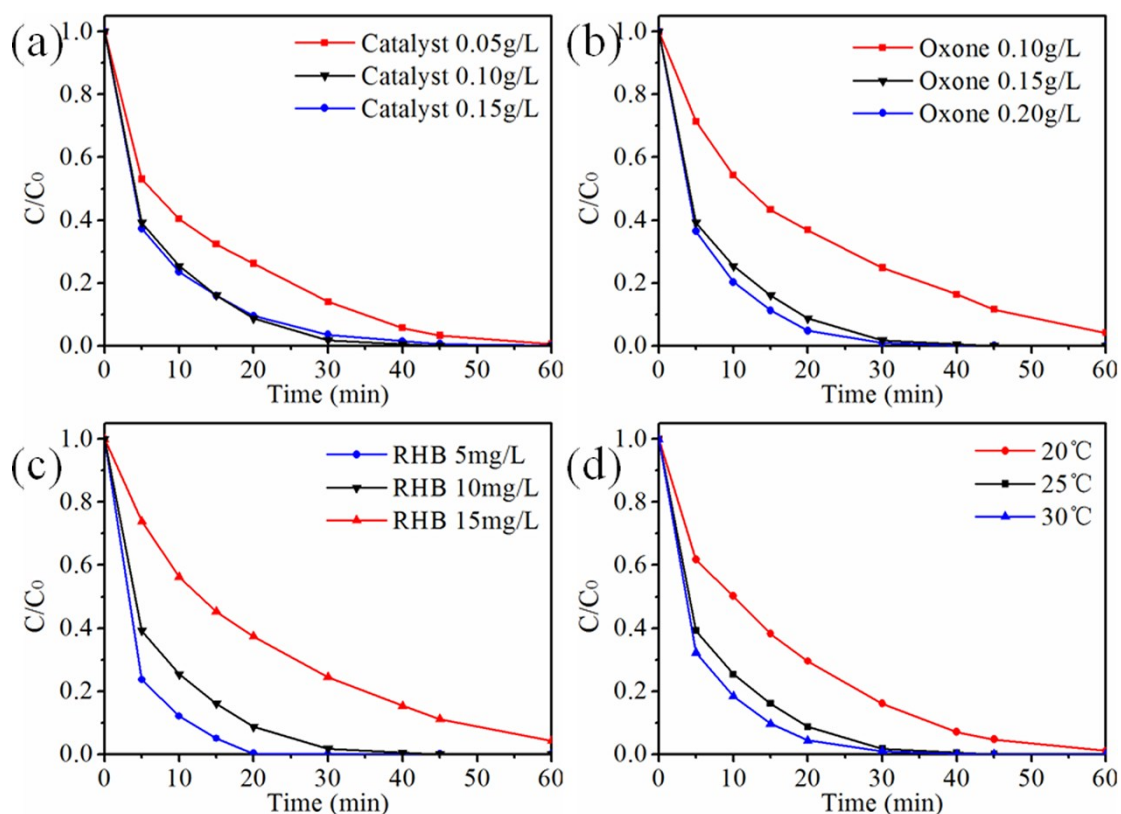

**Fig S4** The effect of single factor on degradation reaction. (a) catalyst concentration; (b) oxidant concentration; (c) RhB concentration; (d) reaction temperature. Unless otherwise stated, the reaction conditions are based on: [RhB]=10mg/L, catalyst loading = 0.1g/L, Oxone loading = 0.15g/L, and  $T = 25\text{ }^{\circ}\text{C}$ .

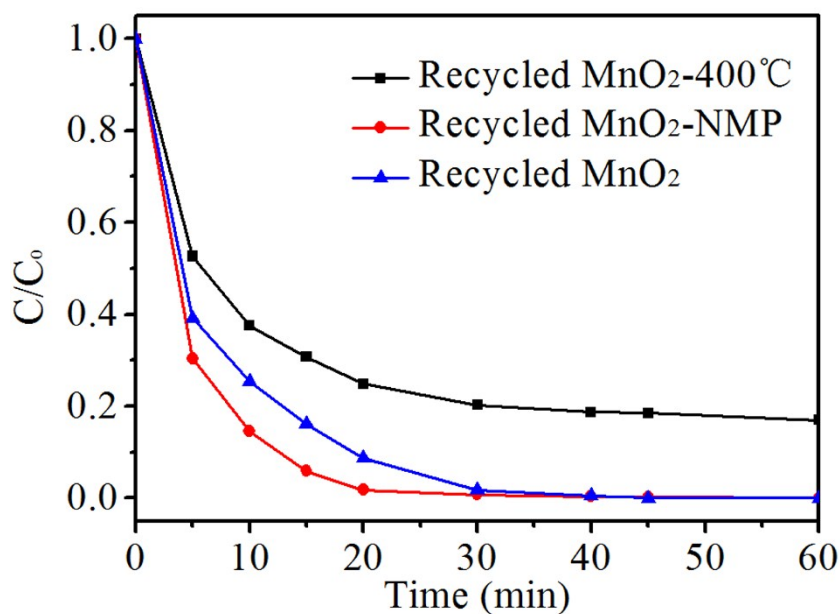

**Fig S5** Tests of catalytic activation for the recycled  $\text{MnO}_2$  before and after being treated with NMP and treated under  $400\text{ }^{\circ}\text{C}$ . Unless otherwise stated, the reaction conditions are based on:



[RhB]=10mg/L, catalyst loading = 0.1g/L, Oxone loading = 0.15g/L, and T = 25 °C.

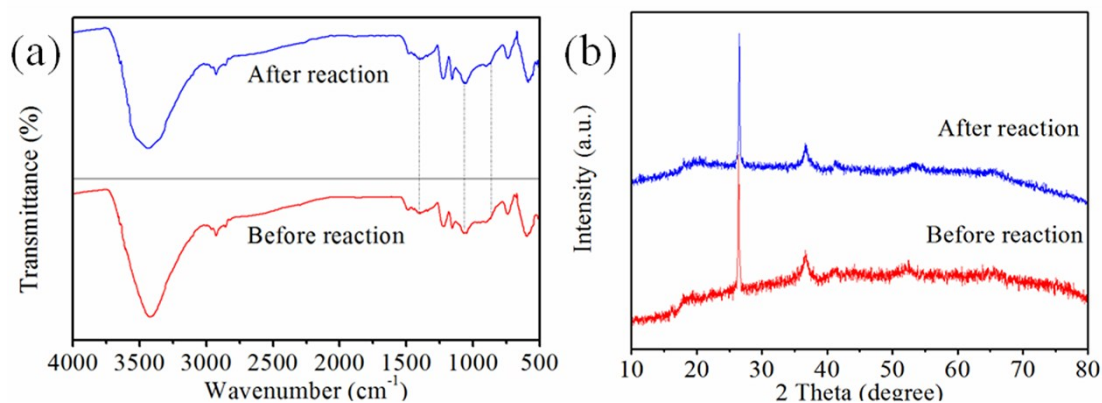

**Fig S6** (a) FT-IR spectra and (b) XRD patterns of the recycled MnO<sub>2</sub> catalysts before and after reaction.

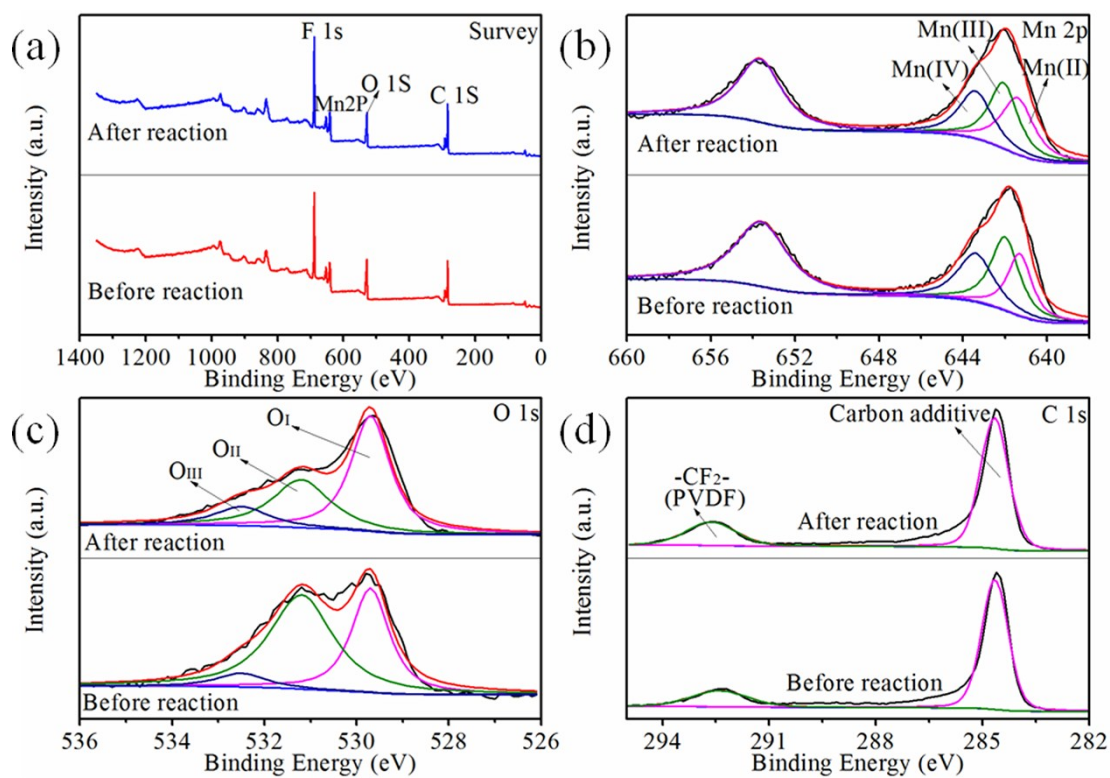

**Fig .S7** XPS spectra of the fresh and used the recycled MnO<sub>2</sub>: (a) survey spectra of the sample, (b) Mn 2p, (c) O 1s, and (d) C 1s.

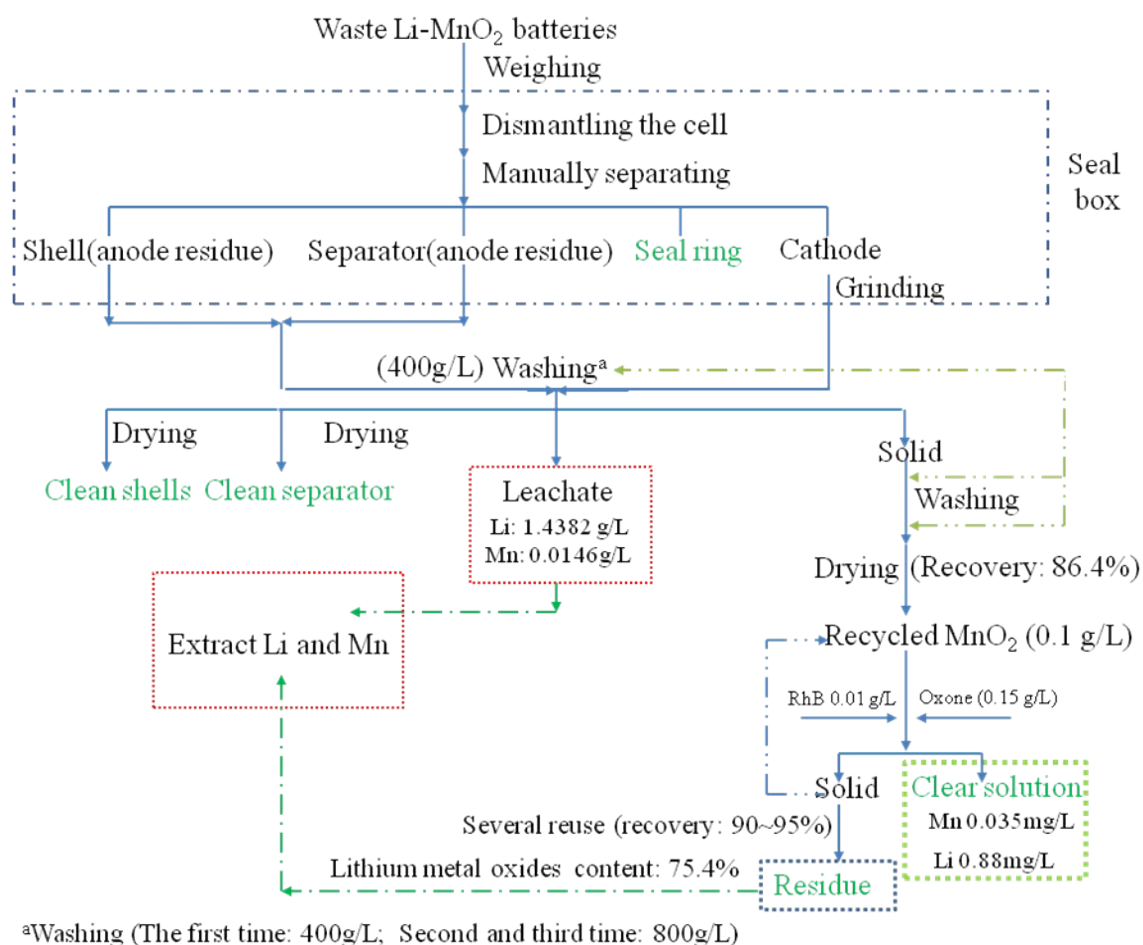

**Fig. S8** A proposed green process for the recycling of cathode materials from the waste Li-MnO<sub>2</sub>.

**Table S2** The metal contents of the leachate from previous washing<sup>a</sup>

| Metals              | Mn        | Li        |
|---------------------|-----------|-----------|
| Concentration (g/L) | 0.0146g/L | 1.4382g/L |

<sup>a</sup>washing (the first time: 400g/L; Second and third time: 800g/L)

**Table S3** The metal contents of the cleaning solution from subsequent washing

| Metals               | Mn       | Li        |
|----------------------|----------|-----------|
| Concentration (mg/L) | 0.07mg/L | 20.87mg/L |

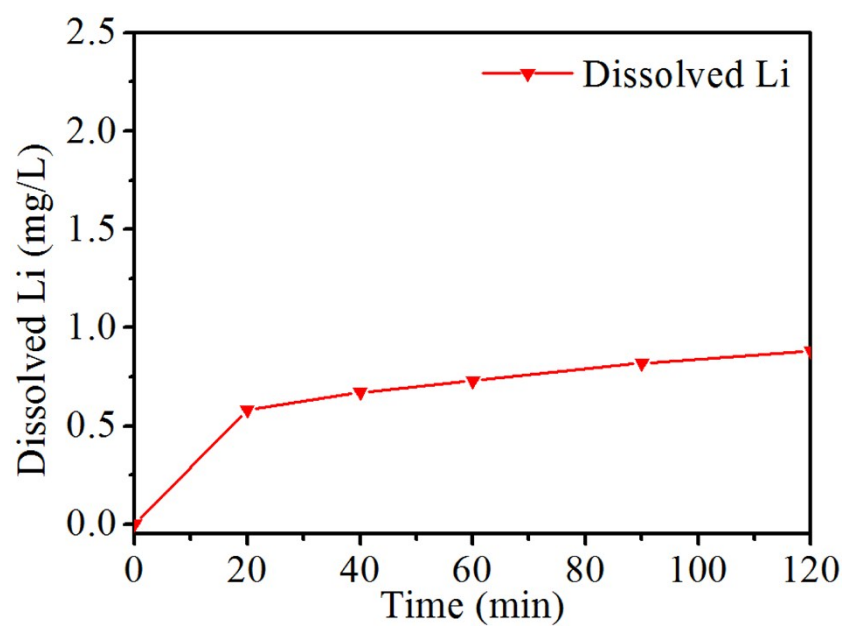

**Fig. S9** Dissolution of Mn from the recycled  $\text{MnO}_2$  under degradation.. The reaction conditions:  $[\text{RhB}] = 10 \text{ mg/L}$ , catalyst loading =  $0.1 \text{ g/L}$ , oxone loading =  $0.15 \text{ g/L}$ , and  $T = 25^\circ\text{C}$ .



**Table S4** Summary of the recycling for waste batteries.

| Batteries types        | Major reagents                                                                 | Recycling method                                                                                                             | Material obtained                                                  | Application and performance                                                                                                                                                   | Ref       |
|------------------------|--------------------------------------------------------------------------------|------------------------------------------------------------------------------------------------------------------------------|--------------------------------------------------------------------|-------------------------------------------------------------------------------------------------------------------------------------------------------------------------------|-----------|
| LIBs <sup>a</sup> -NCM | NMP<br>NaOH<br>Oxalic acid<br>Na <sub>2</sub> CO <sub>3</sub>                  | Metals ion of leaching in oxalic acid and precursor calcined at 900 °C                                                       | Regenerated NCM                                                    | ·Battery<br>·Initial discharge capacity of 168 mA h g <sup>-1</sup> at 0.2C, and 91.5% retained after 150 cycles.                                                             | 3         |
| Ni-Cd                  | H <sub>2</sub> SO <sub>4</sub><br>Na <sub>2</sub> CO <sub>3</sub>              | Dissolution with H <sub>2</sub> SO <sub>4</sub> .<br>Formation of precipitate CdCO <sub>3</sub> and calcination at 500 °C.   | CdO nanoparticle                                                   | ·Photocatalytic<br>·The removal efficiency of 28 mg/L RB5 dye was 65.42 %, 61.80 % and 67.01 % for pH=4.00, pH=5.97 and pH=8.00 in 480 min, respectively.                     | 4         |
| LIBs-NCM               | NaOH                                                                           | Al foil dissolution with NaOH and recycled cathode materials calcined at 600 °C                                              | Ni-Co-Mn oxides                                                    | ·Air battery<br>·The energy efficiency was 75% at a current density of 10 mA/cm <sup>2</sup> in an air battery                                                                | 5         |
| LIBs-LFP               | DMAC <sup>b</sup>                                                              | DMAC dissolve binder and solid phase sintering.                                                                              | Regenerated LiFePO <sub>4</sub>                                    | ·Battery<br>·Discharge capacities of 120 mA h g <sup>-1</sup> at 0.1C, and capacities of 144 mA h g <sup>-1</sup> with doping ratio of 3 : 7 at 700 °C.                       | 6         |
| LIBs-LCO               | Citric acid<br>H <sub>2</sub> O <sub>2</sub>                                   | Sol and a gel reaction and thermal annealing at 450 °C.                                                                      | Co <sub>3</sub> O <sub>4</sub> /LiCoO <sub>2</sub>                 | ·Photocatalytic<br>·90% of 3 mg/L methylene blue dye removed in 10 h and 100% after 24 h with 60 mg/L catalyst and 60 ml/L H <sub>2</sub> O <sub>2</sub> .                    | 7         |
| Zn-MnO <sub>2</sub>    | Carbon nanotube                                                                | Calcination at 350 °C and ball mill with Mn <sub>3</sub> O <sub>4</sub> and CNT                                              | Mn <sub>3</sub> O <sub>4</sub> /carbon nanotube                    | ·Battery and electrocatalyst<br>·Reversible specific capacitance of 580 mA h g <sup>-1</sup> after 100 cycles. Positive onset potential of -0.15 V.                           | 8         |
| LIBs-LFP               | H <sub>3</sub> PO <sub>4</sub><br>Li <sub>2</sub> CO <sub>3</sub><br>Glucose   | Acid-leaching solution refluxed at 85 °C, and carbonization with glucose                                                     | LiFePO <sub>4</sub> /C                                             | ·Battery<br>·Capacity of 159.3 mAh g <sup>-1</sup> at 0.1C and 86.3 mAh g <sup>-1</sup> at 20C rate, capacity of 105 mAh g <sup>-1</sup> after 500 cycles at 5C.              | 9         |
| Zn-MnO <sub>2</sub>    | H <sub>2</sub> SO <sub>4</sub><br>H <sub>2</sub> O <sub>2</sub><br>Citric acid | Metals dissolved with H <sub>2</sub> SO <sub>4</sub> and H <sub>2</sub> O <sub>2</sub> , and the sticky gel calcined at 400° | Mn <sub>0.6</sub> Zn <sub>0.4</sub> Fe <sub>2</sub> O <sub>4</sub> | ·Electric Fenton<br>·89.2% of 0.1 mM BPA removed in 60 min at current density of 3.36 mA/cm <sup>2</sup> with 1 mM PDS , and 77.5% of BPA removed in 60min after third cycle. | 10        |
| Li-MnO <sub>2</sub>    | -                                                                              | Washing                                                                                                                      | Recycled MnO <sub>2</sub>                                          | ·Catalyst<br>·~100% of 10 mg/L RhB removed in 45 min with 0.1 g/L catalyst and 0.15 g/L Oxone.<br>·97.9 % of RhB removed in 60 min after fifth cycle                          | This work |

<sup>a</sup>LIBs:(NCM: LiNi<sub>1/3</sub>Co<sub>1/3</sub>Mn<sub>1/3</sub>O<sub>2</sub>; LCO: LiCoO<sub>2</sub>; LFP: LiFePO<sub>4</sub>); <sup>b</sup>DMAC: dimethyl acetamide.

**Table S5** Various catalysts in heterogeneous PMS activation for organic pollutants degradation

| Catalysts                                            | Catalyst synthesis                                           | Pollutant   | Amount of leaching metals                  | Performance                                                                                                                               | Ref           |
|------------------------------------------------------|--------------------------------------------------------------|-------------|--------------------------------------------|-------------------------------------------------------------------------------------------------------------------------------------------|---------------|
| Monolithic A                                         | CoCA-<br>•Hydrothermal<br>•Freeze-dried<br>•Calcination      | Phenol      | Co:0.014 mg/L in 60 min                    | •87% of 20 mg/L phenol removed in 60 min with 1.0 g/L catalyst and 2.6 mM Oxone<br>•67% of phenol removed in 60 min after third run       | <sup>11</sup> |
| Corolla-like MnO <sub>2</sub>                        | δ-<br>•Hydrothermal                                          | Phenol      | Mn: 3.0 mg/L in 3 h                        | •100% of 20 mg/L phenol removed in 30 min with 0.2 g/L catalyst and 2.0 g/L Oxone<br>•100% of phenol removed in 60 min after third run    | <sup>12</sup> |
| Co <sub>x</sub> Mn <sub>3-x</sub> O <sub>4</sub>     | •Hydrothermal<br>•Calcination                                | Rhodamine B | Co and Mn: <0.1 mg/L in 80 min             | •~ 100% of RhB removed in 80 min with 0.02 g/L catalyst and 0.2 g/L Oxone<br>•87.0% of RhB removed in 80 min after fifth cycle            | <sup>13</sup> |
| Mn <sub>3</sub> O <sub>4</sub> /rGO                  | •Hydrothermal                                                | Orange II   | Mn: 0.02 mg/L in 90 min                    | •100% of Orange II removed in 90 min with 0.05 g/L catalyst and 1.5 g/L Oxone<br>•~ 100% of Orange II removed in 90 min after fifth cycle | <sup>14</sup> |
| CoFe <sub>2</sub> O <sub>4</sub> /TNTs               | •Hydrothermal<br>•Impregnation<br>•Calcination               | Rhodamine B | Co: 0.39 mg/L in 60 min                    | •97% of 100 mg/L RhB removed in 60 min with 0.20 g/L catalyst and 4.0 g/L Oxone.<br>•~ 94.4% of RhB removed in 60 min after third cycle   | <sup>15</sup> |
| Mn-MGO                                               | •Hydrothermal                                                | Bisphenol A | Mn: ~ 2.1 mg/L in 30 min                   | •95% of 0.4 mmol/L BPA removed in 30 min with 0.5 g/L catalyst and 5.0 mmol/L PMS.<br>•86% of BPA removed in 30 min after fifth run       | <sup>16</sup> |
| MnFeO Nanospheres                                    | •Aging<br>•Calcination                                       | Bisphenol A | Mn: 0.02 mg/L in 30 min                    | •95% of 10 mg/L BPA removed in 30 min with 0.1 g/L catalyst and 0.2 g/L Oxone<br>•~ 54% of BPA removed in 30 min after third cycle        | <sup>17</sup> |
| CuO-Co <sub>3</sub> O <sub>4</sub> @MnO <sub>2</sub> | •Aging<br>•Impregnation<br>•Calcination                      | Phenol      | Co: 0.06 mg/L<br>Cu: 0.08 mg/L in 100 min  | •100% of 300ppm phenol removed in 100 min with 0.1 g/L catalyst and 0.5 g/L Oxone<br>•84% of phenol removed in 100 min after third cycle  | <sup>18</sup> |
| Recycled MnO <sub>2</sub>                            | •Direct acquisition from waste Li-MnO <sub>2</sub> batteries | Rhodamine B | Mn: 0.035 mg/L<br>Li: 0.88 mg/L in 120 min | •~100% of 10 mg/L RhB removed in 45 min with 0.1 g/L catalyst and 0.15 g/L Oxone.<br>•97.9% of RhB removed in 60 min after fifth cycle    | This work     |

### Simplified assessment of economic and energy consumption

The recycling of waste Li-MnO<sub>2</sub> batteries proposed in this study mainly involves dismantling and simple washing process. We assume that one ton of waste Li-MnO<sub>2</sub> batteries were processed per day in china. The average wage of per labor is \$39 per day that base on the working day is 300 days per year (average 25 days per month) in china. Meanwhile, the working time is about 8 hours every day. The industrial electricity charge and water price are \$0.20/kWh (maximum) and \$0.40/t (maximum) respectively.

Considering the residuals rate and interest rate, depreciation cost of equipment is calculated as Eq. (S1) while the cost of equipment maintenance cost is calculated as Eq. (S2)

$$C_D = C_O \times (1 - r) \times \frac{i}{1 - (1 + i)^{-n}} \quad (S1)$$

C<sub>D</sub>—— Depreciation cost of equipment

C<sub>O</sub>—— Acquisition cost of equipment

r—— Residuals rate of equipment,4%

i—— Interest rate,10%

n—— Service life, year

$$M_C = C_O \times 0.05 \quad (S2)$$

M<sub>C</sub>—— Maintenance cost of equipment

C<sub>O</sub> —— Acquisition cost of equipment

And the cost of electricity, water and labor are calculated as Eq. (S3), (S4) and (S5):

$$C_P = P \times t \times p_e \quad (S3)$$

C<sub>P</sub>—— Cost of electricity

P—— Equipment power, kW

t—— Working time of equipment, h

P<sub>e</sub>—— Electricity price for industrial uses,\$0.20/kWh

$$C_W = V \times P_W \quad (S4)$$

C<sub>W</sub>—— Cost of water

V—— Water consumption, ton/day

P<sub>w</sub>—— Water price for industrial uses,\$0.4/t

$$C_L = m \times p_s \quad (S5)$$

C<sub>L</sub>—— Cost of labor

m—— Number of workers

P<sub>s</sub>—— Wage of per labor, \$39/day

### Process I: Crushing and Screening

There is no commercial automatic dismantling equipment of integral separation for button batteries on the market. Therefore, we refer to the commercial crusher to estimate the cost of

dismantling process. The crusher (P=11kW, price \$14400, maximum capacity=8 t/h, service life 5 years) work for 1 h every day.

$$C_D = C_O \times (1 - r) \times \frac{i}{1 - (1 + i)^{-n}} = \left( \$14400 \times \frac{1}{300} \right) \times (1 - 4\%) \times \frac{10\%}{1 - (1 + 10\%)^{-5}} = \$12.16$$

$$M_C = C_O \times 0.05 = \left( \$14400 \times \frac{1}{300} \right) \times 0.05 = \$2.4$$

$$C_P = P \times t \times p_e = 11kW \times 1h \times \$0.20kW/h = \$2.2$$

$$C_L = m \times p_s = 1 \times \$39 = \$39$$

Compared with mechanical dismantling, the cost of manual dismantling is also calculated.

(manual dismantling maximum capacity=1.102kg/h, work time=908h, number of workers=114)

$$C_L = m \times p_s = 114 \times \$39 = \$4446$$

Total cost: \$55.76

After this process, about 382kg cathode materials can be obtained in this study, and about 585kg scrap iron can be also obtained in this study.

## Process II: Washing, Filtering and Drying

**Stirring cleaning requirement:** A mixer (P=5.5 kW, per price=\$3565, maximum capacity =2 t/per, service life = 3 years) is needed to work for 2 h.

$$C_D = (\$14400 \times C_O \times (1 - r) \times \frac{i}{1 - (1 + i)^{-n}} = \left( \$3565 \times \frac{1}{300} \right) \times (1 - 4\%) \times \frac{10\%}{1 - (1 + 10\%)^{-5}} = \$3.01$$

$$M_C = C_O \times 0.05 = \left( \$3565 \times \frac{1}{300} \right) \times 0.05 = \$0.6$$

$$C_P = P \times t \times p_e = 5.5kW \times 2h \times \$0.20kW/h = \$2.2$$

$$C_L = m \times p_s = 1 \times \$39 = \$39$$

During the pre-washing process, the consumed water is 5t (the first time: 400g/L; Second and third time: 800g/L).

$$C_W = V \times P_W = 5t \times \$0.4 = \$2$$

The cleaning water of post-treatment of the cathode material can be recycled repeatedly, where their costs are not included in the total cost.

Total cost: \$46.81

**Filtering requirement:** A self-discharging filtering machine(P=20 kW, per price=\$5800, maximum capacity =4 t/h, service life = 3 years) is needed to work for 1 h.

$$C_D = (\$14400 \times C_O \times (1 - r) \times \frac{i}{1 - (1 + i)^{-n}} = \left( \$5800 \times \frac{1}{300} \right) \times (1 - 4\%) \times \frac{10\%}{1 - (1 + 10\%)^{-5}} = \$4.90$$

$$M_C = C_O \times 0.05 = \left( \$5800 \times \frac{1}{300} \right) \times 0.05 = \$1.0$$

$$C_P = P \times t \times p_e = 20kW \times 1h \times \$0.20kW/h = \$4.0$$

$$C_L = m \times p_s = 1 \times \$39 = \$39$$

Total cost: \$48.9

**Drying requirement:** A conveyor drier (P=40 kW, per price=\$15180, maximum capacity =200kg/per, service life = 5 years) is needed to work for 2h.

$$C_D = (\$14400 \times C_O \times (1 - r) \times \frac{i}{1 - (1 + i)^{-n}} \\ = \left( \$15180 \times \frac{1}{300} \right) \times (1 - 4\%) \times \frac{10\%}{1 - (1 + 10\%)^{-5}} = \$12.82$$

$$M_C = C_O \times 0.05 = \left( \$15180 \times \frac{1}{300} \right) \times 0.05 = \$2.53$$

$$C_P = P \times t \times p_e = 40kW \times 2h \times \$0.20kW/h = \$16.0$$

$$C_L = m \times p_s = 1 \times \$39 = \$39$$

Total cost: \$70.35

After this process, about 330.05kg recycled MnO<sub>2</sub> can be obtained in this study.

In summary, the total cost of this recycling process in this study is **\$221.82**.

But, note that the obtained cathode materials as catalysts can be used repeatedly, where the total cost of recycling process of waste batteries should be shared from the number of uses of catalyst. In addition, the recovery of scrap iron can be obtained certain economic benefits.

## Reference

1. A. S. Poyraz, J. Huang, S. Cheng, D. C. Bock, L. Wu, Y. Zhu, A. C. Marschilok, K. J. Takeuchi and E. S. Takeuchi, *Green Chemistry*, 2016, **18**, 3414-3421.
2. X. Qin, S. Fang, L. Zhao, P. Shi, J. Fan, Y. Min, Q. Xu and W. Yao, *The Science of the total environment*, 2017, **601-602**, 99-108.
3. X. Zhang, Y. Bian, S. Xu, E. Fan, Q. Xue, Y. Guan, F. Wu, L. Li and R. Chen, *ACS Sustainable Chemistry & Engineering*, 2018, **6**, 5959-5968.
4. T. F. M. Moreira, I. L. Santana, M. N. Moura, S. A. D. Ferreira, M. F. F. Lelis and M. B. J. G. Freitas, *Materials Chemistry and Physics*, 2017, **195**, 19-27.
5. J. Wei, S. Zhao, L. Ji, T. Zhou, Y. Miao, K. Scott, D. Li, J. Yang and X. Wu, *Resources, Conservation and Recycling*, 2018, **129**, 135-142.
6. X. Song, T. Hu, C. Liang, H. L. Long, L. Zhou, W. Song, L. You, Z. S. Wu and J. W. Liu, *RSC Advances*, 2017, **7**, 4783-4790.
7. I. L. Santana, T. F. M. Moreira, M. F. F. Lelis and M. B. J. G. Freitas, *Materials Chemistry and Physics*, 2017, **190**, 38-44.
8. L.-H. Zhang, S.-S. Wu, Y. Wan, Y.-F. Huo, Y.-C. Luo, M.-Y. Yang, M.-C. Li and Z.-G. Lu, *Rare Metals*, 2017, **36**, 442-448.
9. D. Bian, Y. Sun, S. Li, Y. Tian, Z. Yang, X. Fan and W. Zhang, *Electrochimica Acta*, 2016, **190**, 134-140.
10. B. Deng, Y. Li, W. Tan, Z. Wang, Z. Yu, S. Xing, H. Lin and H. Zhang, *Chemosphere*, 2018, **204**, 178-185.
11. P. Hu, M. Long, X. Bai, C. Wang, C. Cai, J. Fu, B. Zhou and Y. Zhou, *Journal of hazardous materials*, 2017, **332**, 195-204.
12. Y. Wang, H. Sun, H. M. Ang, M. O. Tadé and S. Wang, *Applied Catalysis B: Environmental*, 2015, **164**, 159-167.
13. Y. Yao, Y. Cai, G. Wu, F. Wei, X. Li, H. Chen and S. Wang, *Journal of hazardous materials*,

- 2015, **296**, 128-137.
14. L. Zhang, L. Zhao and J. Lian, *RSC Advances*, 2014, **4**, 41838-41847.
  15. Y. Du, W. Ma, P. Liu, B. Zou and J. Ma, *Journal of hazardous materials*, 2016, **308**, 58-66.
  16. J. Du, J. Bao, Y. Liu, H. Ling, H. Zheng, S. H. Kim and D. D. Dionysiou, *Journal of hazardous materials*, 2016, **320**, 150-159.
  17. G.-X. Huang, C.-Y. Wang, C.-W. Yang, P.-C. Guo and H.-Q. Yu, *Environmental science & technology*, 2017, **51**, 12611-12618.
  18. A. Khan, Z. Liao, Y. Liu, A. Jawad, J. Ifthikar and Z. Chen, *Journal of hazardous materials*, 2017, **329**, 262-271.
